# Supplementary figures and images for: CXCL13 predicts disease activity in early rheumatoid arthritis and could be an indicator of the therapeutic `window of opportunity'
Source: Springer Nature journal article supplement (doi:10.1186/s13075-014-0434-z), 2014-09-23

**A**

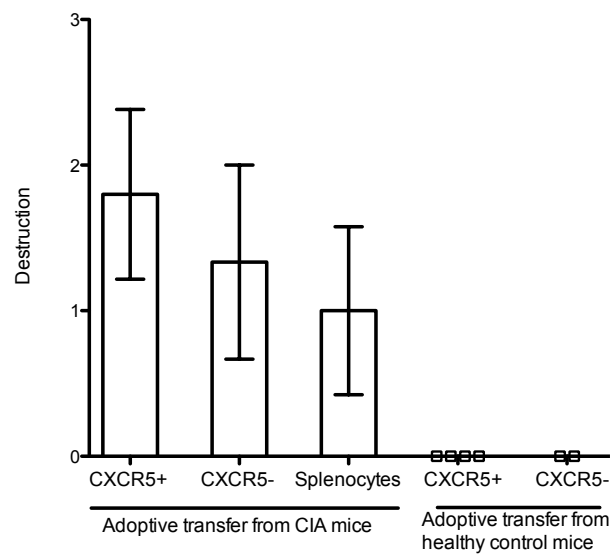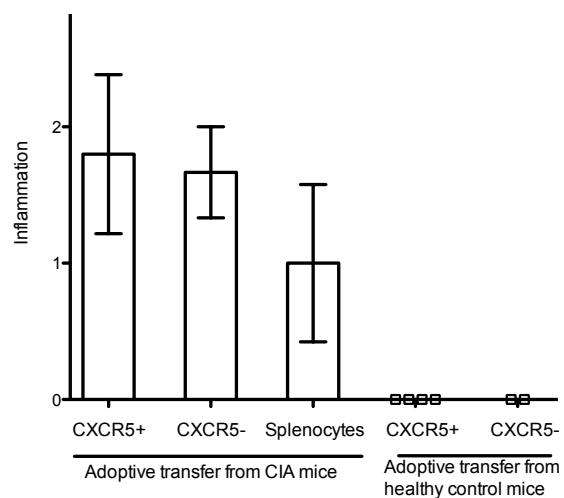

**B**

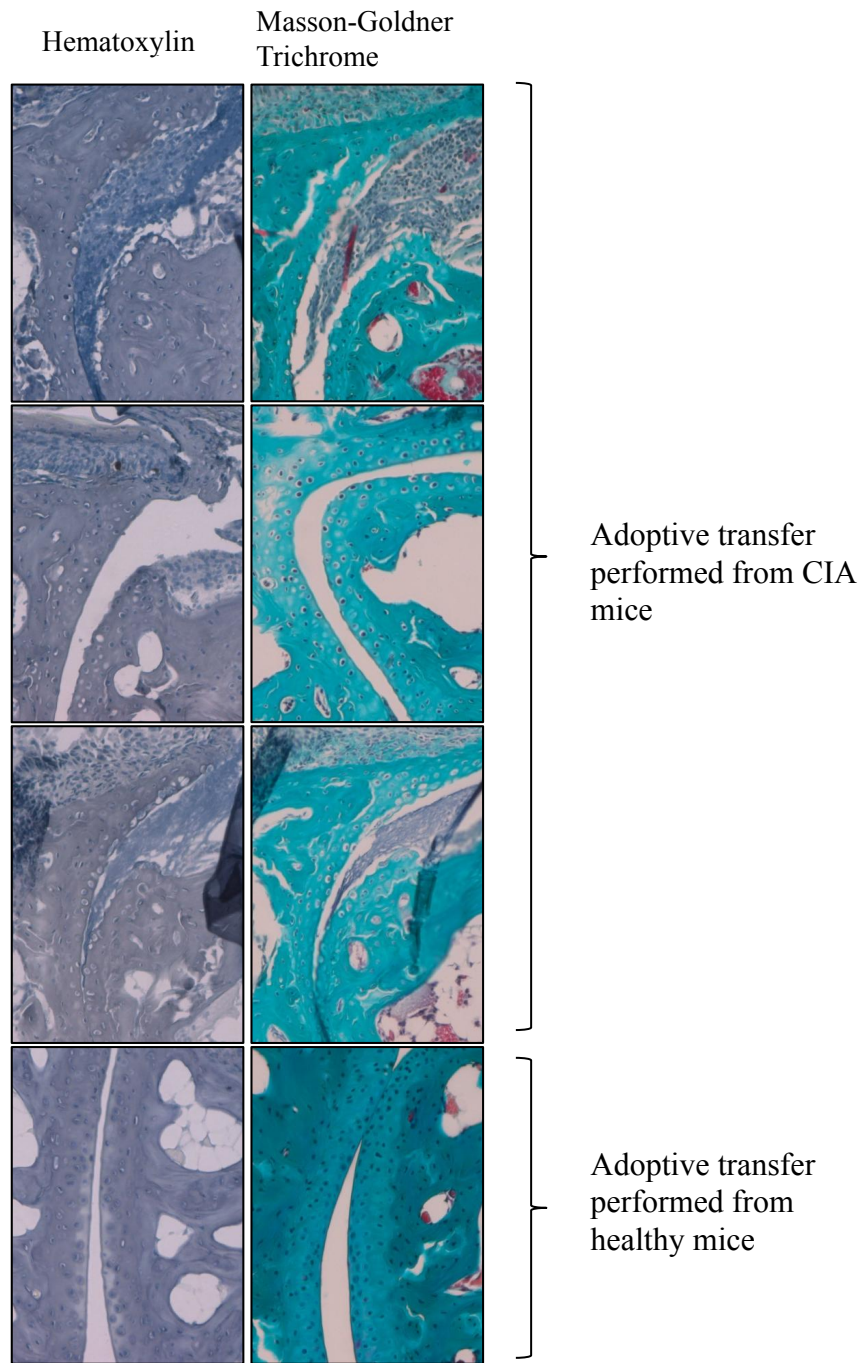

Supplement: MOESM6 [file 9783294]
